# Supplementary material
Source: publisher figshare collection journal article supplement (https://asha.figshare.com/articles/dataset/_/27068173)
Supplement: Supplementary file 1 [file 1]

## Supplemental Material S4.

Excerpts of speech data of two participants.

| <b>Picture 7</b>                                                      |                          |                              |                 |                                                |                                                                                                             |
|-----------------------------------------------------------------------|--------------------------|------------------------------|-----------------|------------------------------------------------|-------------------------------------------------------------------------------------------------------------|
| Participant: Akindhu <sup>1</sup><br>Age at testing: 3 years 8 months |                          |                              |                 | Participant: Ayaara<br>Age at testing: 3 years |                                                                                                             |
| <b>Target word</b>                                                    | <b>Adult realisation</b> | <b>Akindhu's realisation</b> | <b>Analysis</b> | <b>Ayaara's realisation</b>                    | <b>Analysis</b>                                                                                             |
| 1. trees                                                              | /gas/                    | /gas/                        | No error        | /gat/                                          | Stopping                                                                                                    |
| 2. jambu fruit                                                        | /ɟambu/                  | /ɟambu/                      | No error        | /dambu/                                        | Fronting of palatals                                                                                        |
| 3. monkey                                                             | ~<br>/wadura/            | ~<br>/wadula/                | Lateralisation  | /wadula/                                       | Denasalization of prenasalized stops, Lateralisation                                                        |
| 4. rambutan fruit                                                     | ~<br>/rabutaŋ/           | ~<br>/labutaŋ/               | Lateralisation  | /labutaŋ/                                      | Lateralisation, Denasalization of prenasalized stops, Fronting of retroflex, Fronting of nasal velar sounds |

<sup>1</sup> Pseudonyms used.

|                        |                     |                     |          |                  |                                                          |
|------------------------|---------------------|---------------------|----------|------------------|----------------------------------------------------------|
| 5. squirrel            | /le:n <b>ɑ</b> /    | /le:n <b>ɑ</b> /    | No error | /le:n <b>ɑ</b> / | No error                                                 |
| 6. sound of a squirrel | /tɪŋ tɪŋ/           | /tɪŋ tɪŋ/           | No error | /tɪn tɪn/        | Fronting of retroflex,<br>Fronting of nasal velar sounds |
| 7. mango               | ~<br>/ <b>ɑ</b> bə/ | ~<br>/ <b>ɑ</b> bə/ | No error | / <b>ɑ</b> bə/   | Denasalization of prenasalized stops                     |
