# Supplementary material
Source: publisher figshare collection journal article supplement (https://asha.figshare.com/articles/dataset/_/27068173)
Supplement: Supplementary file 2 [file 1]

## Supplemental Material S5.

Case study example.

Shamal is 3 years 6 months. This is a speech sample based on a selection of the words from the TAPS produced by him.

| Target word         | Adult realization | Child realization |  | Analysis based on findings of the current study.               |
|---------------------|-------------------|-------------------|--|----------------------------------------------------------------|
| 1. mango            | ~<br>abə          | abə               |  | Denasalization of prenasalized stop sounds:<br>Typical process |
| 2. well             | ~<br>lidə         | lidə              |  | Denasalization of prenasalized stop sounds:<br>Typical process |
| 3. elephant's trunk | ~<br>hodəwælə     | hodəwælə          |  | Denasalization of prenasalized stop sounds:<br>Typical process |
| 4. river            | ~<br>gagə         | gagə              |  | Denasalization of prenasalized stop sounds:<br>Typical process |
| 5. king             | rajə              | lajə              |  | Lateralization.                                                |
| 6. red (colour)     | ratu              | latu              |  | Lateralization.                                                |

|          |        |       |  |                                                                                                                                                |
|----------|--------|-------|--|------------------------------------------------------------------------------------------------------------------------------------------------|
| 7. sea   | muhudə | mu:də |  | WSD-typical.<br>Multisyllabic words with /-h-/ medially, may be produced by adults with WSD and not considered an error in colloquial Sinhala. |
| 8. lamp  | pahənə | pɑ:nə |  | WSD-typical.<br>Multisyllabic words with /-h-/ medially, may be produced by adults with WSD and not considered an error in colloquial Sinhala. |
| 9. torch | tɔ:c   | to:c  |  | Fronting.                                                                                                                                      |
| 10. up   | udə    | udə   |  | Fronting.                                                                                                                                      |
