# Supplementary material
Source: publisher figshare collection journal article supplement (https://asha.figshare.com/articles/dataset/_/27068173)
Supplement: Supplementary file 3 [file 1]

### Supplemental Material S3.

Data analysis sheet: Sri Lankan Tamil.

#### Data Analysis Sheet

| Target word                     | Adult realisation | Child response | Comments |
|---------------------------------|-------------------|----------------|----------|
| <b>PICTURE 1</b>                |                   |                |          |
| 1. kite<br>பட்டம்               | paṭṭəm            |                |          |
| 2. green<br>பச்சை               | pacca             |                |          |
| 3. yellow<br>மஞ்சள்             | manjəl            |                |          |
| 4. snake<br>பாம்பு              | pa:mbu            |                |          |
| 5. older brother<br>அண்ணா       | anna              |                |          |
| 6. younger brother<br>தம்பி     | tambi             |                |          |
| <b>PICTURE 2</b>                |                   |                |          |
| 7. tomatoes<br>தக்காளி          | takka:li          |                |          |
| 8. pineapple<br>அன்னாசி         | anna:si/ aNNa:si  |                |          |
| 9. cabbage கோவா                 | go:va:            |                |          |
| 10. yoghurt யோகர்ட்             | jo:gət            |                |          |
| 11. beard/moustache<br>பாண்     | pa:n              |                |          |
| <b>PICTURE 3</b>                |                   |                |          |
| 12. rabbit<br>முயல்             | mujəl             |                |          |
| 13. tortoise<br>ஆமை             | a:mə              |                |          |
| 14. chalk<br>சோக்               | co:k              |                |          |
| <b>PICTURE 4</b>                |                   | ∴              |          |
| 15. machine<br>மெஷின்/இயந்திரம் | mæʃin             |                |          |
| 16. fan<br>பே. ∴ ன்/ விசிறி     | fæ:n              |                |          |

|                                   |                                     |  |  |
|-----------------------------------|-------------------------------------|--|--|
| PICTURE 5                         |                                     |  |  |
| 17. ear<br>காது                   | ka:du                               |  |  |
| 18. lips<br>வாய்/ உதடு            | va:j / udæɖu                        |  |  |
| PICTURE 6                         |                                     |  |  |
| 19. cockerel<br>சேவல்             | se:vəl                              |  |  |
| 20. laddu sweets<br>லட்டு         | ladɖu                               |  |  |
| PICTURE 7                         |                                     |  |  |
| 21. rice<br>சோறு                  | so:ɽu                               |  |  |
| PICTURE 8                         |                                     |  |  |
| 22. lion<br>சிங்கம்               | singəm                              |  |  |
| 23. giraffe<br>ஜிராஃ              | ʒira:f                              |  |  |
| 24. butterfly<br>வண்ணத்துப்பூச்சி | vanna:ttipu:cci/<br>vaNNa:ttipu:cci |  |  |
| PICTURE 9                         |                                     |  |  |
| 25. cricket<br>கிரிக்கெட்         | krikət                              |  |  |
| 26. cap<br>தொப்பி                 | kæp/ ɒppi                           |  |  |
| 27. t-shirt<br>டீ ஷர்ட்           | ti:ʃə:t                             |  |  |
| PICTURE 10                        |                                     |  |  |
| 28. ice cream<br>ஐஸ் கிரீம்       | aɪskri:m                            |  |  |
| 29. black crow<br>காகம்           | ka:xəm/ka:həm                       |  |  |
| 30. mother<br>அம்மா               | amma:                               |  |  |
| PICTURE 11                        |                                     |  |  |
| 31. bread<br>பாண்                 | pɑ:n                                |  |  |
| 32. jam<br>ஜாம்                   | ʒæ:m                                |  |  |
| PICTURE 12                        |                                     |  |  |

|                            |             |  |  |
|----------------------------|-------------|--|--|
| 34. baby<br>குழந்தை        | baba        |  |  |
| 31. brush<br>தூரிகை /பிரஸ் | brəʃ        |  |  |
| PICTURE 13                 |             |  |  |
| 35. cars<br>கார்           | ka:ɾ        |  |  |
| 36. bus<br>பஸ்             | bas         |  |  |
| PICTURE 14                 |             |  |  |
| 37. squirrel<br>அணில்      | anil        |  |  |
| 38. mango<br>மாம்பழம்      | ma:nga      |  |  |
| 39. monkey<br>குரங்கு      | kurangu     |  |  |
| 40. banana<br>வாழைப்பழம்   | va:laipalam |  |  |
| 41. parrot<br>கிளி         | kiʌi        |  |  |
| 42. tree<br>மரம்           | marəm       |  |  |
| 43. cashew<br>கஜூ          | kaju        |  |  |
| 44. cow<br>மாடு            | ma:du       |  |  |
| PICTURE 15                 |             |  |  |
| 45. cat<br>பூனை            | pu:ne       |  |  |
| 46. mouse<br>எலி           | eʌi/eli     |  |  |
| PICTURE 16                 |             |  |  |
| 47. fish<br>மீன்           | mi:n        |  |  |
| 48. dolphin<br>டொல்பின்    | ɖolfin      |  |  |
| PICTURE 17                 |             |  |  |
| 49. rose<br>ரோசா           | roʒa        |  |  |
| 50. cake<br>கேக்           | ke:k        |  |  |
| 51. balloon<br>பலூன்       | bælu:n      |  |  |

|                                                                                                       |                                                                               |  |  |
|-------------------------------------------------------------------------------------------------------|-------------------------------------------------------------------------------|--|--|
| PICTURE 18                                                                                            |                                                                               |  |  |
| 52. torch<br>டோர்ச்                                                                                   | to:c                                                                          |  |  |
| 53. elephant<br>யானை                                                                                  | ja:nəj                                                                        |  |  |
| 54. gecko<br>பல்லி                                                                                    | paɫli                                                                         |  |  |
| <b>Sentence-level</b>                                                                                 |                                                                               |  |  |
| PICTURE 19                                                                                            |                                                                               |  |  |
| Cat பூனை<br>Mouse எலி<br>Rose ரோசா                                                                    | pu:ne<br>eɭi/eli<br>roʒa:                                                     |  |  |
| PICTURE 20                                                                                            |                                                                               |  |  |
| Elephant யானை<br>Giraffe ஜிராஃ<br>cow மாடு<br>lion சிங்கம்<br>hat தொப்பி<br>cake கேக்<br>snake பாம்பு | ja:nəj<br>ʒira:f<br>ma:du<br>singəɪm<br>toppi<br>ke:k<br>pa:mbu               |  |  |
| PICTURE 21                                                                                            |                                                                               |  |  |
| pineapple அன்னாசி<br>cockrel சேவல்<br>butterfly<br>வண்ணத்துப்பூச்சி<br>tomato<br>தக்காளி              | anna:si/ aNNa:si<br>se:vəl<br>vanna:ttipu:cci/<br>vaNNa:ttipu:cci<br>takka:li |  |  |
