# Supplementary material
Source: publisher figshare collection journal article supplement (https://asha.figshare.com/articles/dataset/_/27068173)
Supplement: Supplementary file 4 [file 1]

## Supplemental Material S2.

Data analysis sheet: Sinhala.

### Data Analysis Sheet

| Target picture         | Target response | Child response | Initial | Medial | Final | Comments |
|------------------------|-----------------|----------------|---------|--------|-------|----------|
| PICTURE 1              |                 |                |         |        |       |          |
| 1. sarong<br>සරම       | sarəmə          |                |         |        |       |          |
| 2. cap<br>තොප්පිය      | toppijə         |                |         |        |       |          |
| 3. key<br>යතුර         | jaturə          |                |         |        |       |          |
| 4. ring<br>මුද්ද       | muddə           |                |         |        |       |          |
| 5. hands<br>අත්        | at              |                |         |        |       |          |
| 6. flowers<br>මල්      | mal             |                |         |        |       |          |
| 7. hair<br>කොන්ඩේ      | konɖe           |                |         |        |       |          |
| PICTURE 2              |                 |                |         |        |       |          |
| 8. carrot<br>කැරට්     | kærət           |                |         |        |       |          |
| 9. pumpkin<br>වට්ටක්කා | wattakka        |                |         |        |       |          |

|                                  |            |  |  |  |  |  |
|----------------------------------|------------|--|--|--|--|--|
| 10. beans<br>බෝංචි               | bo:ŋci     |  |  |  |  |  |
| PICTURE 3                        |            |  |  |  |  |  |
| 11. sewing machine<br>මැෂින්     | mæʃin      |  |  |  |  |  |
| 12. fridge<br>ෆ්‍රිජ්            | frij       |  |  |  |  |  |
| PICTURE 4                        |            |  |  |  |  |  |
| 13. swing<br>ඔන්විල්ලාව          | oŋcilla:wə |  |  |  |  |  |
| 14. drum<br>රබාන                 | raba:nə    |  |  |  |  |  |
| 15. cashew<br>කජු                | kaɟu       |  |  |  |  |  |
| 16. firecrackers<br>රනිකුද්දා    | ratɪŋa     |  |  |  |  |  |
| 17. sound of firecrackers<br>බෝං | ɖo:ŋ       |  |  |  |  |  |
| PICTURE 5                        |            |  |  |  |  |  |
| 18. mother<br>අම්මා              | amma       |  |  |  |  |  |
| 19. father<br>තාත්තා             | ta:tta     |  |  |  |  |  |
| PICTURE 6                        |            |  |  |  |  |  |

|                                   |              |  |  |  |  |  |
|-----------------------------------|--------------|--|--|--|--|--|
| 20. train<br>කෝච්චිය              | ko:ccijə     |  |  |  |  |  |
| 21. smoke<br>දුම්                 | duŋ          |  |  |  |  |  |
| 22. butterfly<br>සමනලයා           | samənələja   |  |  |  |  |  |
| PICTURE 7                         |              |  |  |  |  |  |
| 23. trees<br>ගස්                  | gas          |  |  |  |  |  |
| 24. jambu fruit<br>ජම්බු          | ɟambu        |  |  |  |  |  |
| 25. monkey<br>වදුරා               | ~<br>wadura  |  |  |  |  |  |
| 26. rambutan<br>රබුටන්            | ~<br>rabuɬaŋ |  |  |  |  |  |
| 27. squirrel<br>ලේනා              | le:na        |  |  |  |  |  |
| 28. squirrel's noise<br>ටින් ටින් | tiŋ tiŋ      |  |  |  |  |  |
| 29. mango<br>අඹ                   | ~<br>abə     |  |  |  |  |  |

|                                |             |  |  |  |  |  |
|--------------------------------|-------------|--|--|--|--|--|
| 30.<br>chimpanzee<br>චිම්පන්සි | cimpansi    |  |  |  |  |  |
| PICTURE 8                      |             |  |  |  |  |  |
| 31. eggs<br>බිත්තර             | bittərə     |  |  |  |  |  |
| 32. crow<br>කාක්කා             | ka:kka      |  |  |  |  |  |
| PICTURE 9                      |             |  |  |  |  |  |
| 33. snake<br>නයා               | naja        |  |  |  |  |  |
| 34. cat<br>පුසා                | pu:sa       |  |  |  |  |  |
| 35. dog<br>බල්ලා               | balla       |  |  |  |  |  |
| 36. up<br>උඩ                   | uḍə         |  |  |  |  |  |
| PICTURE 10                     |             |  |  |  |  |  |
| 37. river<br>ගඟ                | ~<br>gaga   |  |  |  |  |  |
| 38. fish<br>මාළු               | ma:lu       |  |  |  |  |  |
| 39.<br>crocodile<br>කිඹුලා     | ~<br>kibula |  |  |  |  |  |

|                                 |               |  |  |  |  |  |
|---------------------------------|---------------|--|--|--|--|--|
| 40. duck<br>කාරාවා              | ta:ra:wa      |  |  |  |  |  |
| PICTURE 11                      |               |  |  |  |  |  |
| 41. torch<br>ටෝච්               | ʔo:c          |  |  |  |  |  |
| 42. elephant<br>අලියා           | alija         |  |  |  |  |  |
| 43. trunk<br>හොඬවැල             | ~<br>hoɖəwælə |  |  |  |  |  |
| 44. well<br>විදි                | ~<br>liðə     |  |  |  |  |  |
| PICTURE 12                      |               |  |  |  |  |  |
| 45. kite<br>සරුංගලය             | sarungəle     |  |  |  |  |  |
| 46. sea<br>මුහුද                | muhudə        |  |  |  |  |  |
| 47. older<br>brother<br>අයියා   | aijja         |  |  |  |  |  |
| 48. younger<br>brother<br>මල්ලි | malli         |  |  |  |  |  |
| PICTURE 13                      |               |  |  |  |  |  |
| 49. purple<br>දම්               | dam           |  |  |  |  |  |
| 50. red                         | ratu          |  |  |  |  |  |

|                 |        |  |  |  |  |  |
|-----------------|--------|--|--|--|--|--|
| රතු             |        |  |  |  |  |  |
| 51. dolphin     | dɒlfin |  |  |  |  |  |
| ඩොල්ෆින්        |        |  |  |  |  |  |
| PICTURE 14      |        |  |  |  |  |  |
| 52. grandmother | a:cci  |  |  |  |  |  |
| ආච්චි           |        |  |  |  |  |  |
| 53. tortoise    | ibba   |  |  |  |  |  |
| ඉඬ්ඬා           |        |  |  |  |  |  |
| 54. rabbit      | ha:wa  |  |  |  |  |  |
| හාවා            |        |  |  |  |  |  |
| 55. sleeping    | nidi   |  |  |  |  |  |
| නිදි            |        |  |  |  |  |  |
| PICTURE 15      |        |  |  |  |  |  |
| 56. paper boats | bo:tɪu |  |  |  |  |  |
| බෝට්ටු          |        |  |  |  |  |  |
| 57. rain        | wæssə  |  |  |  |  |  |
| වැස්ස           |        |  |  |  |  |  |
| 58. sky         | ahasə  |  |  |  |  |  |
| අහස             |        |  |  |  |  |  |
| 59. umbrellas   | kuɒe   |  |  |  |  |  |
| කුඬ්ඬි          |        |  |  |  |  |  |
| PICTURE 16      |        |  |  |  |  |  |

|                         |          |  |  |  |  |  |
|-------------------------|----------|--|--|--|--|--|
| 60. cricket<br>ක්‍රිකට් | krikət   |  |  |  |  |  |
| 61. t-shirt<br>ටීෂට්    | ʈi:ʃə:t  |  |  |  |  |  |
| 62. trouser<br>කලිසම    | kalisəmə |  |  |  |  |  |
| 63. shoes<br>සපත්තු     | sapattu  |  |  |  |  |  |
| 64. ice cream<br>සපත්තු | aiskri:m |  |  |  |  |  |

#### PICTURE 17

|                               |          |  |  |  |  |  |
|-------------------------------|----------|--|--|--|--|--|
| 65. birthday present<br>තෑග්ග | tæ:ggə   |  |  |  |  |  |
| 66. cake<br>කේක්              | ke:k     |  |  |  |  |  |
| 67. cars<br>කාර්              | ka:r     |  |  |  |  |  |
| 68. tyre<br>ටයර්              | ʈajərəjə |  |  |  |  |  |

#### PICTURE 18

|                   |      |  |  |  |  |  |
|-------------------|------|--|--|--|--|--|
| 69. king<br>රජ    | rajə |  |  |  |  |  |
| 70. stomach<br>බඩ | baɖə |  |  |  |  |  |

|                                          |           |  |  |  |  |  |
|------------------------------------------|-----------|--|--|--|--|--|
| 71. eyes<br>ඇස්                          | æs        |  |  |  |  |  |
| PICTURE 19                               |           |  |  |  |  |  |
| 72. drawing<br>චිත්ර                     | citrə     |  |  |  |  |  |
| 73. chalk<br>චෝක්                        | co:k      |  |  |  |  |  |
| 74. giraffe<br>ජීරාල්                    | ʒira:f    |  |  |  |  |  |
| PICTURE 20                               |           |  |  |  |  |  |
| 75.<br>procession/<br>perahera<br>පෙරහැර | perəhæərə |  |  |  |  |  |
| 76. flag<br>කොඩිය                        | koɖijə    |  |  |  |  |  |
| 77. anklet<br>ගෙජ්ජි                     | gejʒi     |  |  |  |  |  |
| PICTURE 21                               |           |  |  |  |  |  |
| 78. lamps<br>පහන්                        | pahan     |  |  |  |  |  |
| 79. jasmin<br>flowers<br>ජිව්ව           | piccə     |  |  |  |  |  |
| SENTENCE-LEVEL (possible target words)   |           |  |  |  |  |  |
| Picture 1                                |           |  |  |  |  |  |



|                                                                                                                                                                  |  |
|------------------------------------------------------------------------------------------------------------------------------------------------------------------|--|
| (elephant,<br>trunk, well)<br><br>අලියා<br>හොඬවැල<br><br>මිද                                                                                                     |  |
| <b>Picture 2</b><br><br>(monkey,<br>hats,<br>rambutan,<br>jambu<br>fruits,<br>purple,<br>trees,<br>sleeping)<br><br>වදුරා තොප්පි<br>රඹුටන් ජම්බු දම්<br>ගස් නිදි |  |
| <b>Picture 3</b><br><br>(rabbit,<br>tortoise,<br>carrot, flag,<br>mango)<br><br>හාවා ඉබ්බා<br>කැරට් කොඩිය<br>අඹ                                                  |  |
| <b>COMMENTS</b>                                                                                                                                                  |  |
