# Supplementary material
Source: publisher figshare collection journal article supplement (https://asha.figshare.com/articles/dataset/_/27068173)
Supplement: Supplementary file 5 [file 1]

## Supplemental Material S1.

Frequency distribution of the phonological features in the Sinhala phonology picture-naming task.

| Consonant | Frequency        |                 |                | Syllable shape | Frequency |
|-----------|------------------|-----------------|----------------|----------------|-----------|
|           | Syllable-initial | Syllable-medial | Syllable-final |                |           |
| P         | 4                | 3               | -              | VC             | 2         |
| b         | 5                | 3               | -              | CVC            | 10        |
| m         | 6                | 6               | 2              | VCV            | 2         |
| w         | 3                | 4               | -              | CVCV           | 13        |
| t         | 4                | 2               | 3              | VCCV           | 3         |
| d         | 2                | 5               | -              | CCVC           | 1         |
| n         | 4                | 8               | 1              | CVCVC          | 5         |
| s         | 2                | 3               | -              | VCVCV          | 2         |
| l         | 2                | 8               | 2              | CVCCV          | 14        |
| r         | 2                | 11              | 1              | VVCCV          | 1         |
| ʃ         | 5                | 13              | 1              | CVCVCV         | 8         |
| c         | -                | 2               | -              | CVCCVC         | 1         |
| ɟ         | 3                | 5               | 1              | CCVCVC         | 1         |
| ʈ         | 2                | 3               | 1              | CVCVCVC        | 1         |
| ɳ         | -                | 1               | -              | CVCCVCV        | 3         |
| j         | 1                | 9               | -              | CVCVCCV        | 2         |
| k         | 12               | 4               | 2              | VVCCVC         | 1         |
| g         | 3                | 2               | -              |                |           |
| ŋ         | -                | 3               | 4              |                |           |
| h         | 2                | 4               | -              |                |           |

|   |   |   |   |                |    |
|---|---|---|---|----------------|----|
| ~ |   |   |   | CVCVCVCV       | 4  |
| b | - | 3 | - | CVCCVCCV       | 2  |
| ~ |   |   |   | CVCVCCVCV      | 1  |
| d | - | 2 | - | CVCVCCVCV      | 1  |
| ~ |   |   |   | CVCVCVCVCV     | 1  |
| q | - | 1 | - |                |    |
| ~ |   |   |   | Number in word |    |
| g | - | 1 | - | 1 syllable     | 20 |
|   |   |   |   | 2 syllables    | 36 |
|   |   |   |   | 3 syllables    | 16 |
|   |   |   |   | 4 syllables    | 6  |
|   |   |   |   | 5 syllables    | 1  |
